# Supplementary material for: First Estimation of the Annual Biosynthetic Calorie Production by Phytoplankton in the Yellow Sea, South Sea of Korea, East China Sea, and East Sea
Source: MDPI journal article supplement (doi:10.3390/w15132489), 2023-07-06
Supplement: s1 [file s1]

**Table S1. Biochemical concentration integrated within euphotic water column at each station in the Yellow Sea, 2018. FM represents sum of carbohydrates, proteins, and lipids.**

| Season | Station | Chlorophyll <i>a</i><br>(mg m <sup>-2</sup> ) | Carbohydrates<br>(g m <sup>-2</sup> ) | Proteins<br>(g m <sup>-2</sup> ) | Lipids<br>(g m <sup>-2</sup> ) | FM<br>(g m <sup>-2</sup> ) | Calorie Content<br>(Kcal m <sup>-2</sup> ) | Calorie Content/<br>chlorophyll <i>a</i><br>(Kcal (mg) <sup>-1</sup> ) |
|--------|---------|-----------------------------------------------|---------------------------------------|----------------------------------|--------------------------------|----------------------------|--------------------------------------------|------------------------------------------------------------------------|
| Winter | 307-03  | 1.8                                           | 1.6                                   | 0.6                              | 0.6                            | 2.8                        | 15.3                                       | 8.6                                                                    |
|        | 307-05  | 1.7                                           | 1.2                                   | 0.4                              | 1.2                            | 2.8                        | 18.6                                       | 10.7                                                                   |
|        | 307-09  | 3.7                                           | 2.6                                   | 0.5                              | 2.0                            | 5.1                        | 32.3                                       | 8.7                                                                    |
|        | 309-03  | 7.3                                           | 2.9                                   | 1.0                              | 1.3                            | 5.3                        | 30.2                                       | 4.1                                                                    |
|        | 309-05  | 4.2                                           | 3.6                                   | 0.6                              | 1.8                            | 6.0                        | 35.4                                       | 8.4                                                                    |
|        | 309-09  | 4.1                                           | 3.1                                   | 0.8                              | 1.6                            | 5.5                        | 32.2                                       | 7.8                                                                    |
|        | 310-09  | 3.9                                           | 4.5                                   | 1.0                              | 2.1                            | 7.6                        | 44.0                                       | 11.3                                                                   |
|        | 311-05  | 2.4                                           | 1.4                                   | 0.3                              | 0.6                            | 2.3                        | 13.4                                       | 5.7                                                                    |
|        | 311-09  | 2.3                                           | 1.6                                   | 0.2                              | 1.1                            | 2.9                        | 18.0                                       | 7.7                                                                    |
|        | 312-09  | 1.3                                           | 2.2                                   | 0.2                              | 1.1                            | 3.5                        | 20.3                                       | 16.2                                                                   |
|        | Mean    | 3.3                                           | 2.5                                   | 0.6                              | 1.3                            | 4.4                        | 26.0                                       | 8.9                                                                    |
|        | S.D.    | 1.8                                           | 1.1                                   | 0.3                              | 0.5                            | 1.8                        | 10.2                                       | 3.3                                                                    |
| Spring | 307-03  | 6.1                                           | 1.1                                   | 0.6                              | 0.4                            | 2.2                        | 12.0                                       | 2.0                                                                    |
|        | 307-05  | 5.0                                           | 1.0                                   | 0.4                              | 0.4                            | 1.7                        | 9.9                                        | 2.0                                                                    |
|        | 307-09  | 17.9                                          | 1.4                                   | 1.9                              | 2.3                            | 5.5                        | 37.5                                       | 2.1                                                                    |
|        | 309-03  | 46.1                                          | 1.9                                   | 1.3                              | 3.2                            | 6.4                        | 45.7                                       | 1.0                                                                    |
|        | 309-05  | 60.0                                          | 4.1                                   | 2.7                              | 3.3                            | 10.1                       | 63.0                                       | 1.1                                                                    |
|        | 309-09  | 18.7                                          | 2.7                                   | 1.9                              | 2.2                            | 6.7                        | 42.0                                       | 2.2                                                                    |
|        | 310-03  | 24.1                                          | 1.1                                   | 1.1                              | 1.1                            | 3.3                        | 20.9                                       | 0.9                                                                    |

|        |        |      |      |     |     |      |       |      |
|--------|--------|------|------|-----|-----|------|-------|------|
|        | 311-07 | 14.7 | 2.4  | 0.9 | 1.1 | 4.4  | 25.3  | 1.7  |
|        | 312-05 | 22.2 | 3.1  | 1.1 | 1.7 | 5.8  | 34.4  | 1.6  |
|        | 312-09 | 96.6 | 4.3  | 2.2 | 2.2 | 8.7  | 50.6  | 0.5  |
|        | Mean   | 31.1 | 2.3  | 1.4 | 1.8 | 5.5  | 34.1  | 1.5  |
|        | S.D.   | 28.6 | 1.2  | 0.7 | 1.0 | 2.7  | 17.2  | 0.6  |
| Summer | 307-03 | 3.0  | 0.7  | 0.2 | 0.3 | 1.2  | 6.6   | 2.2  |
|        | 307-05 | 11.2 | 3.5  | 1.2 | 2.2 | 6.8  | 41.5  | 3.7  |
|        | 307-09 | 9.6  | 5.1  | 1.2 | 3.2 | 9.5  | 58.1  | 6.1  |
|        | 308-06 | 11.0 | 6.9  | 1.7 | 4.6 | 13.2 | 81.7  | 7.4  |
|        | 309-03 | 21.0 | 8.8  | 1.6 | 4.2 | 14.5 | 84.5  | 4.0  |
|        | 309-05 | 14.9 | 11.0 | 0.9 | 5.7 | 17.6 | 104.2 | 7.0  |
|        | 309-09 | 14.1 | 8.5  | 1.4 | 5.4 | 15.3 | 94.1  | 6.7  |
|        | 311-07 | 8.2  | 11.8 | 1.1 | 4.9 | 17.8 | 101.0 | 12.4 |
|        | 311-09 | 10.7 | 9.4  | 0.9 | 4.2 | 14.6 | 84.0  | 7.9  |
|        | 312-09 | 17.2 | 6.9  | 1.4 | 5.0 | 13.3 | 83.3  | 4.8  |
|        | Mean   | 12.1 | 7.3  | 1.2 | 4.0 | 12.4 | 73.9  | 6.2  |
|        | S.D.   | 5.0  | 3.4  | 0.4 | 1.7 | 5.2  | 30.3  | 2.8  |
| Fall   | 307-03 | 5.4  | 1.8  | 0.4 | 0.7 | 2.9  | 15.9  | 3.0  |
|        | 307-05 | 26.1 | 4.6  | 1.4 | 2.0 | 8.0  | 45.1  | 1.7  |
|        | 307-09 | 29.9 | 9.1  | 1.2 | 5.5 | 15.8 | 95.8  | 3.2  |
|        | 308-06 | 9.7  | 4.0  | 0.9 | 3.3 | 8.2  | 52.5  | 5.4  |
|        | 309-03 | 22.5 | 6.0  | 1.3 | 3.6 | 10.9 | 66.2  | 2.9  |
|        | 309-07 | 18.6 | 6.3  | 1.5 | 3.2 | 11.1 | 65.1  | 3.5  |
|        | 310-06 | 12.1 | 9.3  | 1.3 | 4.1 | 14.7 | 83.8  | 6.9  |
|        | 311-07 | 25.9 | 7.1  | 1.5 | 3.2 | 11.8 | 67.8  | 2.6  |
|        | 311-09 | 14.2 | 10.0 | 1.2 | 4.0 | 15.3 | 85.9  | 6.1  |

|        |      |     |     |     |      |      |     |
|--------|------|-----|-----|-----|------|------|-----|
| 312-09 | 20.3 | 8.8 | 0.9 | 3.0 | 12.7 | 69.4 | 3.4 |
| Mean   | 18.4 | 6.7 | 1.2 | 3.2 | 11.1 | 64.8 | 3.9 |
| S.D.   | 8.0  | 2.7 | 0.3 | 1.3 | 4.0  | 22.9 | 1.7 |

**Table S2. Biochemical concentration integrated within euphotic water column at each station in the South Sea of Korea, 2018. FM represents sum of carbohydrates, proteins, and lipids.**

| Season | Station | Chlorophyll <i>a</i><br>(mg m <sup>-2</sup> ) | Carbohydrates<br>(g m <sup>-2</sup> ) | Proteins<br>(g m <sup>-2</sup> ) | Lipids<br>(g m <sup>-2</sup> ) | FM<br>(g m <sup>-2</sup> ) | Calorie Content<br>(Kcal m <sup>-2</sup> ) | Calorie Content/<br>chlorophyll <i>a</i><br>(Kcal (mg) <sup>-1</sup> ) |
|--------|---------|-----------------------------------------------|---------------------------------------|----------------------------------|--------------------------------|----------------------------|--------------------------------------------|------------------------------------------------------------------------|
| Winter | 204-04  | 10.0                                          | 4.7                                   | 0.3                              | 1.1                            | 6.0                        | 31.0                                       | 3.1                                                                    |
|        | 205-03  | 11.1                                          | 4.6                                   | 0.3                              | 1.3                            | 6.2                        | 33.1                                       | 3.0                                                                    |
|        | 205-05  | 17.4                                          | 4.6                                   | 0.3                              | 1.6                            | 6.5                        | 36.2                                       | 2.1                                                                    |
|        | 206-03  | 5.6                                           | 3.0                                   | 0.4                              | 1.1                            | 4.5                        | 24.9                                       | 4.5                                                                    |
|        | 207-03  | 9.3                                           | 7.7                                   | 1.1                              | 1.9                            | 10.7                       | 55.5                                       | 6.0                                                                    |
|        | 313-09  | 3.2                                           | 2.6                                   | 0.2                              | 0.9                            | 3.7                        | 20.4                                       | 6.4                                                                    |
|        | 314-03  | 42.3                                          | 3.3                                   | 0.9                              | 1.5                            | 5.7                        | 32.9                                       | 0.8                                                                    |
|        | 314-07  | 4.7                                           | 2.2                                   | 0.1                              | 0.6                            | 3.0                        | 15.9                                       | 3.4                                                                    |
|        | 400-14  | 14.7                                          | 3.9                                   | 0.6                              | 1.3                            | 5.8                        | 31.8                                       | 2.2                                                                    |
|        | 400-25  | 13.4                                          | 3.7                                   | 0.5                              | 1.4                            | 5.6                        | 31.0                                       | 2.3                                                                    |
|        | Mean    | 13.2                                          | 4.0                                   | 0.5                              | 1.3                            | 5.8                        | 31.3                                       | 3.4                                                                    |
|        | S.D.    | 11.2                                          | 1.5                                   | 0.3                              | 0.4                            | 2.1                        | 10.6                                       | 1.8                                                                    |
| Spring | 204-04  | 34.3                                          | 6.2                                   | 1.4                              | 1.9                            | 9.5                        | 50.8                                       | 1.5                                                                    |
|        | 205-03  | 43.6                                          | 4.4                                   | 2.1                              | 2.5                            | 9.1                        | 54.1                                       | 1.2                                                                    |
|        | 205-05  | 59.0                                          | 5.8                                   | 1.8                              | 2.0                            | 9.6                        | 52.8                                       | 0.9                                                                    |
|        | 206-03  | 89.7                                          | 7.9                                   | 3.2                              | 3.3                            | 14.4                       | 81.6                                       | 0.9                                                                    |
|        | 207-03  | 29.1                                          | 6.5                                   | 1.9                              | 2.4                            | 10.9                       | 60.6                                       | 2.1                                                                    |
|        | 313-09  | 36.2                                          | 4.3                                   | 1.6                              | 2.1                            | 8.0                        | 46.4                                       | 1.3                                                                    |
|        | 314-03  | 25.7                                          | 9.6                                   | 1.4                              | 2.2                            | 13.2                       | 67.8                                       | 2.6                                                                    |

|        |        |      |      |     |     |      |       |      |
|--------|--------|------|------|-----|-----|------|-------|------|
|        | 314-05 | 28.4 | 5.3  | 1.2 | 2.0 | 8.5  | 47.2  | 1.7  |
|        | 314-09 | 21.8 | 3.3  | 0.8 | 1.8 | 5.9  | 34.7  | 1.6  |
|        | 400-27 | 45.0 | 4.6  | 1.4 | 1.9 | 7.9  | 44.3  | 1.0  |
|        | Mean   | 41.3 | 5.8  | 1.7 | 2.2 | 9.7  | 54.0  | 1.5  |
|        | S.D.   | 20.3 | 1.9  | 0.7 | 0.5 | 2.6  | 13.2  | 0.6  |
| Summer | 205-03 | 11.0 | 6.9  | 0.0 | 4.0 | 11.0 | 66.7  | 6.1  |
|        | 205-05 | 17.7 | 5.1  | 0.1 | 3.2 | 8.4  | 52.0  | 2.9  |
|        | 206-03 | 12.3 | 8.6  | 0.0 | 5.7 | 14.3 | 89.3  | 7.3  |
|        | 207-03 | 17.1 | 11.4 | 0.0 | 5.5 | 17.0 | 99.4  | 5.8  |
|        | 313-07 | 13.2 | 8.1  | 0.0 | 5.6 | 13.7 | 86.1  | 6.5  |
|        | 314-03 | 33.4 | 7.1  | 0.6 | 5.9 | 13.7 | 88.9  | 2.7  |
|        | 314-05 | 12.7 | 10.3 | 0.0 | 7.5 | 17.8 | 113.9 | 9.0  |
|        | 314-09 | 17.4 | 9.2  | 0.2 | 5.6 | 15.0 | 91.9  | 5.3  |
|        | 400-14 | 7.6  | 10.0 | 0.0 | 5.1 | 15.1 | 89.7  | 11.9 |
|        | 400-25 | 11.2 | 6.3  | 0.0 | 3.5 | 9.8  | 59.0  | 5.2  |
|        | Mean   | 15.4 | 8.3  | 0.1 | 5.2 | 13.6 | 83.7  | 6.3  |
|        | S.D.   | 6.7  | 1.9  | 0.2 | 1.2 | 2.9  | 18.0  | 2.6  |
| Fall   | 203-03 | 41.2 | 2.7  | 1.4 | 7.6 | 11.7 | 91.1  | 2.2  |
|        | 204-04 | 17.7 | 1.3  | 1.0 | 1.6 | 3.8  | 25.5  | 1.4  |
|        | 205-03 | 42.4 | 2.4  | 1.3 | 2.8 | 6.6  | 44.2  | 1.0  |
|        | 206-03 | 56.5 | 2.3  | 2.1 | 3.3 | 7.8  | 52.9  | 0.9  |
|        | 207-03 | 50.7 | 5.9  | 1.9 | 4.6 | 12.4 | 78.3  | 1.5  |
|        | 313-03 | 27.6 | 4.3  | 1.9 | 4.2 | 10.4 | 68.4  | 2.5  |
|        | 313-09 | 19.2 | 2.2  | 1.3 | 2.5 | 6.1  | 40.3  | 2.1  |
|        | 314-03 | 21.6 | 3.6  | 1.6 | 4.1 | 9.3  | 62.7  | 2.9  |
|        | 314-09 | 24.2 | 2.6  | 1.4 | 3.0 | 7.1  | 47.2  | 2.0  |

|        |      |     |     |     |     |      |     |
|--------|------|-----|-----|-----|-----|------|-----|
| 400-14 | 60.7 | 2.5 | 1.9 | 3.3 | 7.7 | 52.2 | 0.9 |
| Mean   | 36.2 | 3.0 | 1.6 | 3.7 | 8.3 | 56.3 | 1.7 |
| S.D.   | 16.1 | 1.3 | 0.4 | 1.6 | 2.7 | 19.3 | 0.7 |

**Table S3. Biochemical concentration integrated within euphotic water column at each station in the East China Sea, 2018. FM represents sum of carbohydrates, proteins, and lipids.**

| Season | Station | Chlorophyll <i>a</i><br>(mg m <sup>-2</sup> ) | Carbohydrates<br>(g m <sup>-2</sup> ) | Proteins<br>(g m <sup>-2</sup> ) | Lipids<br>(g m <sup>-2</sup> ) | FM<br>(g m <sup>-2</sup> ) | Calorie Content<br>(Kcal m <sup>-2</sup> ) | Calorie Content/<br>chlorophyll <i>a</i><br>(Kcal (mg) <sup>-1</sup> ) |
|--------|---------|-----------------------------------------------|---------------------------------------|----------------------------------|--------------------------------|----------------------------|--------------------------------------------|------------------------------------------------------------------------|
| Winter | 204-04  | 10.0                                          | 4.7                                   | 0.3                              | 1.1                            | 6.0                        | 31.0                                       | 3.1                                                                    |
|        | 205-03  | 11.1                                          | 4.6                                   | 0.3                              | 1.3                            | 6.2                        | 33.1                                       | 3.0                                                                    |
|        | 205-05  | 17.4                                          | 4.6                                   | 0.3                              | 1.6                            | 6.5                        | 36.2                                       | 2.1                                                                    |
|        | 206-03  | 5.6                                           | 3.0                                   | 0.4                              | 1.1                            | 4.5                        | 24.9                                       | 4.5                                                                    |
|        | 400-14  | 14.7                                          | 3.9                                   | 0.6                              | 1.3                            | 5.8                        | 31.8                                       | 2.2                                                                    |
|        | 400-25  | 13.4                                          | 3.7                                   | 0.5                              | 1.4                            | 5.6                        | 31.0                                       | 2.3                                                                    |
|        | Mean    | 13.2                                          | 4.0                                   | 0.5                              | 1.3                            | 5.8                        | 31.3                                       | 3.4                                                                    |
|        | S.D.    | 11.2                                          | 1.5                                   | 0.3                              | 0.4                            | 2.1                        | 10.6                                       | 1.8                                                                    |
| Spring | 204-04  | 34.3                                          | 6.2                                   | 1.4                              | 1.9                            | 9.5                        | 50.8                                       | 1.5                                                                    |
|        | 205-03  | 43.6                                          | 4.4                                   | 2.1                              | 2.5                            | 9.1                        | 54.1                                       | 1.2                                                                    |
|        | 206-03  | 89.7                                          | 7.9                                   | 3.2                              | 3.3                            | 14.4                       | 81.6                                       | 0.9                                                                    |
|        | 207-03  | 29.1                                          | 6.5                                   | 1.9                              | 2.4                            | 10.9                       | 60.6                                       | 2.1                                                                    |
|        | 313-09  | 36.2                                          | 4.3                                   | 1.6                              | 2.1                            | 8.0                        | 46.4                                       | 1.3                                                                    |
|        | 314-03  | 25.7                                          | 9.6                                   | 1.4                              | 2.2                            | 13.2                       | 67.8                                       | 2.6                                                                    |
|        | 314-05  | 28.4                                          | 5.3                                   | 1.2                              | 2.0                            | 8.5                        | 47.2                                       | 1.7                                                                    |
|        | 314-09  | 21.8                                          | 3.3                                   | 0.8                              | 1.8                            | 5.9                        | 34.7                                       | 1.6                                                                    |
|        | 400-27  | 45.0                                          | 4.6                                   | 1.4                              | 1.9                            | 7.9                        | 44.3                                       | 1.0                                                                    |
|        | Mean    | 41.3                                          | 5.8                                   | 1.7                              | 2.2                            | 9.7                        | 54.0                                       | 1.5                                                                    |
|        | S.D.    | 20.3                                          | 1.9                                   | 0.7                              | 0.5                            | 2.6                        | 13.2                                       | 0.6                                                                    |
| Summer | 205-03  | 11.0                                          | 6.9                                   | 0.0                              | 4.0                            | 11.0                       | 66.7                                       | 6.1                                                                    |

|      |        |      |      |     |     |      |       |      |
|------|--------|------|------|-----|-----|------|-------|------|
|      | 205-05 | 17.7 | 5.1  | 0.1 | 3.2 | 8.4  | 52.0  | 2.9  |
|      | 206-03 | 12.3 | 8.6  | 0.0 | 5.7 | 14.3 | 89.3  | 7.3  |
|      | 207-03 | 17.1 | 11.4 | 0.0 | 5.5 | 17.0 | 99.4  | 5.8  |
|      | 313-07 | 13.2 | 8.1  | 0.0 | 5.6 | 13.7 | 86.1  | 6.5  |
|      | 314-03 | 33.4 | 7.1  | 0.6 | 5.9 | 13.7 | 88.9  | 2.7  |
|      | 314-05 | 12.7 | 10.3 | 0.0 | 7.5 | 17.8 | 113.9 | 9.0  |
|      | 314-09 | 17.4 | 9.2  | 0.2 | 5.6 | 15.0 | 91.9  | 5.3  |
|      | 400-14 | 7.6  | 10.0 | 0.0 | 5.1 | 15.1 | 89.7  | 11.9 |
|      | 400-25 | 11.2 | 6.3  | 0.0 | 3.5 | 9.8  | 59.0  | 5.2  |
|      | Mean   | 15.4 | 8.3  | 0.1 | 5.2 | 13.6 | 83.7  | 6.3  |
|      | S.D.   | 6.7  | 1.9  | 0.2 | 1.2 | 2.9  | 18.0  | 2.6  |
| Fall | 203-03 | 41.2 | 2.7  | 1.4 | 7.6 | 11.7 | 91.1  | 2.2  |
|      | 204-04 | 17.7 | 1.3  | 1.0 | 1.6 | 3.8  | 25.5  | 1.4  |
|      | 205-03 | 42.4 | 2.4  | 1.3 | 2.8 | 6.6  | 44.2  | 1.0  |
|      | 206-03 | 56.5 | 2.3  | 2.1 | 3.3 | 7.8  | 52.9  | 0.9  |
|      | 207-03 | 50.7 | 5.9  | 1.9 | 4.6 | 12.4 | 78.3  | 1.5  |
|      | 313-03 | 27.6 | 4.3  | 1.9 | 4.2 | 10.4 | 68.4  | 2.5  |
|      | 313-09 | 19.2 | 2.2  | 1.3 | 2.5 | 6.1  | 40.3  | 2.1  |
|      | 314-03 | 21.6 | 3.6  | 1.6 | 4.1 | 9.3  | 62.7  | 2.9  |
|      | 314-09 | 24.2 | 2.6  | 1.4 | 3.0 | 7.1  | 47.2  | 2.0  |
|      | 400-14 | 60.7 | 2.5  | 1.9 | 3.3 | 7.7  | 52.2  | 0.9  |
|      | Mean   | 36.2 | 3.0  | 1.6 | 3.7 | 8.3  | 56.3  | 1.7  |
|      | S.D.   | 16.1 | 1.3  | 0.4 | 1.6 | 2.7  | 19.3  | 0.7  |



**Table S4. Biochemical concentration integrated within euphotic water column at each station in the East Sea, 2018. FM represents sum of carbohydrates, proteins, and lipids.**

| Season | Station | Chlorophyll <i>a</i><br>(mg m <sup>-2</sup> ) | Carbohydrates<br>(g m <sup>-2</sup> ) | Proteins<br>(g m <sup>-2</sup> ) | Lipids<br>(g m <sup>-2</sup> ) | FM<br>(g m <sup>-2</sup> ) | Calorie Content<br>(Kcal m <sup>-2</sup> ) | Calorie Content/<br>chlorophyll <i>a</i><br>(Kcal (mg) <sup>-1</sup> ) |
|--------|---------|-----------------------------------------------|---------------------------------------|----------------------------------|--------------------------------|----------------------------|--------------------------------------------|------------------------------------------------------------------------|
| Winter | 103-07  | 50.8                                          | 7.0                                   | 1.2                              | 2.9                            | 11.2                       | 63.3                                       | 1.2                                                                    |
|        | 103-11  | 92.9                                          | 4.6                                   | 1.9                              | 3.5                            | 9.9                        | 61.9                                       | 0.7                                                                    |
|        | 105-05  | 19.6                                          | 6.3                                   | 0.5                              | 2.9                            | 9.7                        | 56.3                                       | 2.9                                                                    |
|        | 105-07  | 27.6                                          | 9.3                                   | 0.8                              | 3.8                            | 13.9                       | 78.8                                       | 2.9                                                                    |
|        | 105-11  | 27.0                                          | 9.9                                   | 0.7                              | 3.2                            | 13.8                       | 74.5                                       | 2.8                                                                    |
|        | 107-05  | 34.5                                          | 6.4                                   | 1.0                              | 3.2                            | 10.6                       | 62.1                                       | 1.8                                                                    |
|        | 107-07  | 17.5                                          | 4.8                                   | 0.1                              | 2.7                            | 7.6                        | 45.8                                       | 2.6                                                                    |
|        | 209-05  | 22.0                                          | 7.9                                   | 0.6                              | 3.2                            | 11.7                       | 66.0                                       | 3.0                                                                    |
|        | 209-08  | 49.8                                          | 7.5                                   | 0.9                              | 4.3                            | 12.7                       | 76.2                                       | 1.5                                                                    |
|        | Mean    | 38.0                                          | 7.1                                   | 0.9                              | 3.3                            | 11.2                       | 65.0                                       | 2.1                                                                    |
|        | S.D.    | 23.9                                          | 1.8                                   | 0.5                              | 0.5                            | 2.1                        | 10.4                                       | 0.9                                                                    |
| Spring | 102-06  | 59.7                                          | 3.1                                   | 3.8                              | 3.4                            | 10.3                       | 66.3                                       | 1.1                                                                    |
|        | 103-04  | 44.7                                          | 4.1                                   | 1.5                              | 2.0                            | 7.5                        | 43.7                                       | 1.0                                                                    |
|        | 103-10  | 70.9                                          | 3.7                                   | 3.5                              | 3.7                            | 11.0                       | 70.1                                       | 1.0                                                                    |
|        | 104-05  | 62.3                                          | 3.2                                   | 2.5                              | 2.7                            | 8.4                        | 52.4                                       | 0.8                                                                    |
|        | 104-09  | 61.8                                          | 3.3                                   | 2.5                              | 3.0                            | 8.8                        | 55.9                                       | 0.9                                                                    |
|        | 105-10  | 36.7                                          | 3.3                                   | 1.7                              | 2.0                            | 7.0                        | 42.1                                       | 1.1                                                                    |
|        | 106-03  | 43.1                                          | 3.2                                   | 2.4                              | 2.4                            | 8.0                        | 48.8                                       | 1.1                                                                    |
|        | 106-10  | 40.2                                          | 5.0                                   | 2.5                              | 3.5                            | 11.0                       | 67.8                                       | 1.7                                                                    |
|        | 107-07  | 34.9                                          | 3.7                                   | 3.1                              | 3.1                            | 9.9                        | 61.4                                       | 1.8                                                                    |

|        |        |      |     |     |     |      |      |     |
|--------|--------|------|-----|-----|-----|------|------|-----|
|        | 209-07 | 46.6 | 3.3 | 1.7 | 2.3 | 7.3  | 44.6 | 1.0 |
|        | Mean   | 50.1 | 3.6 | 2.5 | 2.8 | 8.9  | 55.3 | 1.2 |
|        | S.D.   | 12.5 | 0.6 | 0.8 | 0.6 | 1.5  | 10.6 | 0.3 |
| Summer | 102-09 | 12.0 | 4.4 | 1.3 | 3.0 | 8.7  | 53.5 | 4.5 |
|        | 103-09 | 17.9 | 4.6 | 1.1 | 4.0 | 9.7  | 63.0 | 3.5 |
|        | 104-04 | 12.7 | 4.1 | 0.6 | 2.4 | 7.1  | 42.7 | 3.4 |
|        | 104-11 | 8.1  | 4.2 | 0.9 | 3.5 | 8.5  | 55.1 | 6.8 |
|        | 105-07 | 8.4  | 5.1 | 1.0 | 3.9 | 9.9  | 62.8 | 7.5 |
|        | 105-11 | 12.4 | 5.4 | 1.3 | 3.7 | 10.3 | 63.9 | 5.1 |
|        | 106-05 | 17.4 | 3.9 | 1.7 | 3.0 | 8.6  | 54.1 | 3.1 |
|        | 107-03 | 8.0  | 2.6 | 0.8 | 2.1 | 5.5  | 34.7 | 4.4 |
|        | 107-07 | 10.7 | 4.9 | 1.1 | 3.0 | 9.0  | 54.9 | 5.2 |
|        | 209-07 | 18.1 | 6.3 | 1.  | 4.5 | 12.4 | 77.5 | 4.3 |
|        | Mean   | 12.6 | 4.5 | 1.1 | 3.3 | 9.0  | 56.2 | 4.8 |
|        | S.D.   | 4.0  | 1.0 | 0.3 | 0.8 | 1.9  | 11.8 | 1.4 |
| Fall   | 102-07 | 46.2 | 3.0 | 1.5 | 4.5 | 8.9  | 63.1 | 1.4 |
|        | 103-05 | 40.5 | 3.5 | 1.4 | 4.7 | 9.6  | 67.0 | 1.7 |
|        | 103-09 | 28.2 | 2.1 | 1.2 | 4.1 | 7.4  | 54.1 | 1.9 |
|        | 104-08 | 56.3 | 3.2 | 3.0 | 4.3 | 10.4 | 70.0 | 1.2 |
|        | 105-03 | 25.2 | 2.8 | 0.9 | 2.5 | 6.2  | 40.3 | 1.6 |
|        | 105-11 | 22.3 | 2.6 | 1.3 | 3.5 | 7.4  | 50.9 | 2.3 |
|        | 106-07 | 17.5 | 3.5 | 0.9 | 6.7 | 11.1 | 82.8 | 4.7 |
|        | 107-03 | 33.6 | 3.5 | 1.6 | 3.2 | 8.3  | 53.5 | 1.6 |
|        | 107-07 | 18.1 | 3.5 | 0.9 | 4.7 | 9.2  | 64.5 | 3.6 |
|        | 209-04 | 26.0 | 2.0 | 0.9 | 2.4 | 5.3  | 36.0 | 1.4 |
|        | Mean   | 31.4 | 3.0 | 1.4 | 4.1 | 8.4  | 58.2 | 2.1 |
|        | S.D.   | 12.7 | 0.6 | 0.6 | 1.3 | 1.8  | 14.1 | 1.1 |
